# Supplementary material
Source: MDPI journal article supplement (https://www.mdpi.com/1099-4300/21/9/892)
Supplement: s1 [file s1]

$\delta$ -HF $\theta$ -HF $\alpha$ -HF $\beta$ -HF $\gamma$ -HF $\delta$ -LF $\theta$ -LF $\alpha$ -LF $\beta$ -LF $\gamma$ -LF

POS&gt;NEG

N.S.

NEG&gt;POS
