# Supplementary material
Source: MDPI journal article supplement (https://www.mdpi.com/1099-4300/21/9/892)
Supplement: s1 [file s1]

A dark blue outline of a house, with the roof forming a triangle above the text and the base forming a wide V-shape below it. The text 'MDPI' is centered within the house shape.

**MDPI**
